# Supplementary material for: Exploring Mass Public Transit Adoption for Road Traffic Decongestion and Sustainable Development in the Greater Kumasi Metropolis
Source: Research Square preprint supplement (doi:10.21203/rs.3.rs-6856029/v1), 2025-07-28
Supplement: Supplementary file 1 [file 6942cd2f74427d17c321aaf7.docx]

Table 1. Socio-demographic attributes

| **Gender** | **Frequency** | **Percentage** |
| --- | --- | --- |
| Male | 290 | 55.7 |
| Female | 231 | 44.3 |
| **Total** | **521** | **100.0** |
| **Age** | | |
| 15-30 | 252 | **48.4** |
| 31-45 | 126 | **24.2** |
| 46-60 | 91 | 17.5 |
| >60 | 52 | 10.0 |
| **Total** | **521** | **100.0** |
| **Level of Education** | | |
| Basic | 70 | 13.4 |
| Secondary/ Vocational | 125 | 24.0 |
| Tertiary | 274 | 52.6 |
| No formal education | 52 | 10.0 |
| **Total** | **521** | **100.0** |
| **Employment Status** | | |
| Employed | 359 | 68.9 |
| Unemployed | 162 | 31.1 |
| **Total** | **521** | **100.0** |

Table 2: Model-fitting test

| **Model Fitting Information** | | | | |
| --- | --- | --- | --- | --- |
| Model | -2 Log Likelihood | Chi-Square | df | Sig. |
| Intercept Only | 70.944 |  |  |  |
| Final | 49.382 | 21.562 | 5 | .001 |
| Link function: Logit. | | | | |

Table 3: Factors influencing the willingness to switch to MPT from private cars and trotros

|  | Variables | B | Std. Error | Wald | df | Sig. | Exp(B) | 95% Confidence Interval | |
| --- | --- | --- | --- | --- | --- | --- | --- | --- | --- |
|  |  |  |  |  |  |  | Lower Bound | Upper Bound |
| Threshold | Highly willing | 2.189 | 0.266 | 67.85 | 1 | 0 | 8.93 | 1.668 | 2.71 |
| Unwilling | 3.458 | 0.315 | 120.16 | 1 | 0 | 31.75 | 2.84 | 4.077 |
| Location | Lower fares | -0.519 | 0.472 | 1.21 | 1 | 0.271 | 0.60 | -1.445 | 0.406 |
| More reliable schedule | 0.867 | 0.366 | 5.611 | 1 | **0.018** | 2.38 | 0.15 | 1.584 |
| Drop off/ pick up at designated places only | 0.952 | 0.378 | 6.328 | 1 | **0.012** | 2.59 | 0.21 | 1.694 |
| Cleaner and well-maintained buses | 0.542 | 0.463 | 1.369 | 1 | 0.242 | 1.72 | -0.366 | 1.45 |
| Ability to track the location of buses | 1.332 | 0.475 | 7.852 | 1 | **0.005** | 3.79 | 0.4 | 2.263 |
| Dedicated lanes to reduce congestion | 0a | . | . | 0 |  | . | . | . |
| Link function: Logit. | | | | | | | | | |
| a This parameter is set to zero because it is redundant. | | | | | | | | | |

Hint:

Table 4: Association between MPT’s congestion reduction potential and good health, economic growth, and social cohesion

| Variables | MPT significantly reduces congestion | | | Total |  | P-Value |
| --- | --- | --- | --- | --- | --- | --- |
| No. (%) | | | No. (%) |
| Yes | I don’t know | No |
| MPT contributes to good health by reducing air pollution and respiratory infections |  |  |  |  | 165.02 | 0.001 |
| Agree | 421 (80.8) | 20 (3.8) | 10 (1.9) | 451 (86.6) |  |  |
| Disagree | 11 (2.1) | 2 (0.4) | 11 (2.1) | 24 (4.6) |  |  |
| Neutral | 26 (5) | 17 (3.3) | 3 (0.6) | 46 (8.8) |  |  |
| Total | 458 (87.9) | 39 (7.5) | 24 (4.6) | 521 (100) |  |  |
|  | | | | | | |
| MPT contributes to economic growth by increasing travel time reliability, reduces travel cost, and decrease congestion |  |  |  |  | 142.91 | 0.001 |
| Agree | 418 (80.2) | 19 (3.6) | 11 (2.1) | 448 (86) |  |  |
| Disagree | 15 (2.9) | 1 (0.2) | 9 (1.7) | 25 (4.8) |  |  |
| Neutral | 25 (4.8) | 19 (3.6) | 4 (0.8) | 48 (9.2) |  |  |
| Total | 458 (87.9) | 39 (7.5) | 24 (4.6) | 521 (100) |  |  |
|  | | | | | | |
| MPT contributes to social cohesion by improving accessibility, community engagement, and mobility |  |  |  |  | 174.673 | 0.001 |
| Agree | 400 (76.8) | 17 (3.3) | 9 (1.9) | 426 (81.8) |  |  |
| Disagree | 13 (2.5) | 2 (0.4) | 13 (2.5) | 28 (5.4) |  |  |
| Neutral | 45 (8.6) | 20 (3.8) | 2 (0.4) | 67 (12.9) |  |  |
| Total | 458 (87.9) | 39 (7.5) | 24 (4.6) | 521 (100) |  |  |

Hint: The percentages are provided based on the total counts. 5
